# Supplementary material
Source: HighWire-hosted journal article supplement (https://www.rcpjournals.org/highwire/filestream/13949/field_highwire_adjunct_files/0/Al-Hadithy_supplementary_material_S1.pdf)
Supplement: Al-Hadithy_supplementary_material_S1.pdf [file Al-Hadithy_supplementary_material_S1.pdf]

Supplementary material S1: Survey questions.

<https://docs.google.com/forms/d/e/1FAIpQLSeY7I-MHPoeZa1ddOuEHm8OUGM--CTv9sTZ8AipbJopukznFQ/viewform>

Open letter to Simon Stevens, David Behan, Prerana Issar and Matt Hancock to end gender discrimination and the unwarranted variation of working conditions for pregnant women in the NHS.

Do you support the above request?

Yes

No

Not sure - please state how to make amendments

Thank you for contributing to this important initiative. Male allies we welcome your signature on this document as well please!

Have you experienced difficulties (eg with your working patterns or pressure to do things you felt unsafe for your baby) whilst pregnant in the NHS?

Yes - If so - please complete the questions below

No - If you had good experiences please also share these below.

N/A - please feel free to share anything you feel relevant

What is your job?

Your answer

Please can you describe what happened when you were pregnant and how this was managed at your job in the NHS.

Your answer

When did this happen? (Eg month/year)

Your answer

Where did this happen?

Your answer

How would you identify? (Eg British born Chinese, international graduate from Phillipnes etc)

Your answer

If you would like to be a signatory - please provide your name and email.

Your answer

Would you be happy for an anonymous excerpt from your experience to be included in the letter or a paper?

Yes

No

GDPR: By filling in this form, you are adding yourself to a database. This database will exist as a spreadsheet that cannot be publicly accessed. We will draft a letter and paper for publication in a journal including signatories from those who signed up and will include anonymous excerpt and background demographic data for those who consented. If, at any time, you want to remove your details from the database or revoke consent, please email [Nada.alhadithy@gmail.com](mailto:Nada.alhadithy@gmail.com)
